# Supplementary material for: Red tides in the Galician rías: historical overview, ecological impact, and future monitoring strategies
Source: Royal Society of Chemistry journal article supplement (doi:10.1039/d3em00296a), 2023-11-07
Supplement: d3em00296a1.pdf [file d3em00296a1.pdf]

### Tables Bibliography (alphabetical order)

- F. Arévalo, Y. Pazos, J. Correa, C. Salgado, Á. Moroño, B. Paz and J. M. Franco, presented in part at the Proceedings of the 5th International Conference on Molluscan Shellfish Safety, Galway, Ireland, 2006.
- R. Arnaiz, S. Fraga and M. J. Campos, *Annex III; To the report on the Harmful effects of the algal blooms on the mariculture and marine fisheries*, International Council for the Exploration of the Sea, Copenhagen, Denmark, 1988, **CM 1988/F:33<sup>a</sup>**.
- J. Blanco, J. Mariño and M. J. Campos, in *Toxic Dinoflagellates*, eds. D. M. Anderson, A. W. White and D. G. Baden, Elsevier, New York, 1985, pp. 79-84.
- D. W. Crawford, *Mesodinium rubrum*: the phytoplankter that wasn't, *Mar. Ecol. Progr. Ser.*, 1989, **58**, 161-174.
- B. Crespo, F. Figueiras and S. Groom, Role of across-shelf currents in the dynamics of harmful dinoflagellate blooms in the northwestern Iberian upwelling, *Limnology and Oceanography*, 2007, **52**, 2668-2678. E. Gómez Fermín, F. G. Figueiras, B. Arbones and M. L. Villarino, Short-Time scale development of a *Gymnodinium catenatum* population in the Ria de Vigo (NW Spain), *J. Phycol.*, 1996, **32**, 212-221.
- F. De Buen, Sobre la coloración roja del agua en las Rías bajas y la biología de la sardina, *Bol. R. Soc. Esp. Hist. Nat.*, 1918, **18**, 327-331.
- Faro de Vigo* (Spanish newspaper), <https://www.farodevigo.es/hemeroteca/> (reported on 31/08/1979).
- Faro de Vigo* (Spanish newspaper), <https://www.farodevigo.es/hemeroteca/> (reported on 26/11/1997).
- Faro de Vigo* (Spanish newspaper), <https://www.farodevigo.es/hemeroteca/> (reported on 15/08/2000).

*Faro de Vigo* (Spanish newspaper), <https://www.farodevigo.es/hemeroteca/> (reported on 06/06/2000).

*Faro de Vigo* (Spanish newspaper), <https://www.farodevigo.es/hemeroteca/> (reported on 07/08/2001).

*Faro de Vigo* (Spanish newspaper), <https://www.farodevigo.es/hemeroteca/> (reported on 09/07/2008).

*Faro de Vigo* (Spanish newspaper), <https://www.farodevigo.es/hemeroteca/> (reported on 27/11/2014).

*Faro de Vigo* (Spanish newspaper), <https://www.farodevigo.es/hemeroteca/> (reported on 02/09/2015).

F. G. Figueiras and F. X. Niell, Composición del fitoplancton de la ría de Pontevedra (NO de España), *Invest. Pesq.*, 1987, **51**, 371-409.

R. I. Figueroa, I. Bravo, S. Fraga, E. Garcés and G. Llaveria, The life history and cell cycle of *Kryptoperidinium foliaceum*, a dinoflagellate with two eukaryotic nuclei, *Protist*, 2009, **160**, 285-300.

S. Fraga, Las Purgas de mar en las Rías Bajas gallegas, Seminario de Estudos Galegos, 1989, 4, 95-109.

H. W. Graham, *Gymnodinium catenatum*, a new dinoflagellate from the Gulf of California, *T. Am. Microsc. Soc.*, 1943, **62**, 259-261.

P. J. Harrison, K. Furuya, P. M. Glibert, J. Xu, H. Liu, K. Yin, J. H. Lee, D. M. Anderson, R. Gowen and A. Al-Azri, Geographical distribution of red and green *Noctiluca scintillans*, *Chin. J. Oceanol. Limn.*, 2011, **29**, 807-831.

ICES Oceanography Committee, *Report of the ICES-IOC Working group Harmful Algal Blooms Dynamics*, International Council for the Exploration of the Sea, Copenhagen, Denmark, 2002, **CM 2002/C:03**.

- ICES Oceanography Committee, *Report of the ICES-IOC Working group Harmful Algal Blooms Dynamics*, International Council for the Exploration of the Sea, Copenhagen, Denmark, 2004, **CM 2004/C:08**.
- ICES Oceanography Committee, *Report of the ICES-IOC Working group Harmful Algal Blooms Dynamics*, International Council for the Exploration of the Sea, Copenhagen, Denmark, 2012, **CM 2012/SSGHIE:09**.
- C. Jiménez, F. X. Niell, F. G. Figueiras, V. Clavero, P. Algarra and J. Buela, Green mass aggregations of *Gyrodinium aureolum* in the Ría de Pontevedra (NW Spain), *J. Plankton Res.*, 1992, **14**, 705-720.
- S. Khan, O. Arakawa and Y. Onoue, Neurotoxins in a toxic red tide of *Heterosigma akashiwo* (Raphidophyceae) in Kagoshima Bay, Japan, *Aquaculture Research*, 1997, **28**, 9-14. E. Nogueira, I. Bravo, P. Montero, P. Díaz-Tapia, S. Calvo, B. Ben-Gigirey, R. I. Figueroa, J. Garrido, I. Ramilo and N. Lluch, HABs in coastal upwelling systems: Insights from an exceptional red tide of the toxigenic dinoflagellate *Alexandrium minutum*, *Ecol. Indic.*, 2022, **137**, 108790.
- U. Kopuz, A. M. Feyzioglu and A. Valente, An unusual red-tide event of *Noctiluca scintillans* (Macartney) in the Southeastern Black Sea, *Turk. J. Fish. Aquatic Sci.*, 2014, **14**.
- J.-B. Lee, D. Y. Kim and J. Lee, Community dynamics and distribution of dinoflagellates and their cysts in Masan-Chinhae Bay, Korea, *Fish. Aquatic Sci.*, 1998, **1**, 283-292.
- R. Margalef, Estructura y dinámica de la “purga de mar” en la ría de Vigo. *Invest. Pesq.*, 1956, **5**, 113-134.
- R. Margalef, M. Durán and F. Saiz, El fitoplancton de la ría de Vigo de enero de 1953 a marzo de 1954., *Invest. Pesq.*, 1955, **2**, 85-129.
- N. Ospina-Álvarez, R. Prego, I. Álvarez, M. DeCastro, M. T. Álvarez-Ossorio, Y. Y. Pazos and A. Morono, in *Avances y Tendencias en Fitoplancton Tóxico y Biotoxinas. IX Reunión Ibérica sobre Fitoplancton Tóxico y Biotoxinas*, ed. J. Gilabert, Cartagena, 2007, pp. 13-28.

- Pazos, M. Campos, P. Bernárdez, C. García-Soto and M. Gómez-Gesteira, Oceanographical patterns during a summer upwelling–downwelling event in the Northern Galician Rias: Comparison with the whole Ria system (NW of Iberian Peninsula), *Cont. Shelf Res.*, 2010, 30, 1362-1372.
- R. Prego, Flows and budgets of nutrient salts and organic carbon in relation to a red tide in the Ria of Vigo (NW Spain), *Mar. Ecol. Progr. Ser.*, 1992, **79**, 289-302.
- R. Prego, Y. Pazos, J. Maneiro and J. Mariño, in *Harmful Algae. Proceedings of the Eighth International Conference on Harmful Algal Blooms*, eds B. Reguera, J. Blanco, M. L. Fernández and T. Wyatt T. Xunta de Galicia and Intergovernmental Oceanographic Commission of UNESCO Vigo, Spain, 1998, 106-109.
- F. Rodríguez, Marea roja en Cabo Home, <https://fitopasion.com/2015/05/marea-roja-en-cabo-home.html> (reported on 19/05/2015).
- F. Rodríguez, Un mar de Noctilucas en la ría de Vigo, <https://fitopasion.com/2017/09/un-mar-de-noctilucas-en-la-ria-de-vigo.html> (reported on 26/09/2015).
- F. Rodríguez, Las Noctilucas son para el verano, <https://fitopasion.com/2020/08/las-noctilucas-son-para-el-verano.html> (reported on 16/08/2020).
- M. Ruiz-Villarreal, M. Sourisseau, P. Anderson, C. Cusack, P. Neira, J. Silke, F. Rodríguez, B. Ben-Gigirey, C. Whyte and S. Giraudeau-Potel, Novel methodologies for providing *in situ* data to HAB early warning systems in the European Atlantic Area: the PRIMROSE experience, *Front. Mar. Sci.*, 2022, **9**, 791329.
- A. M. Sacilotto Detoni, G. Navarro, J. L. Garrido, F. Rodríguez, J. Hernández-Urcera and I. Caballero, Mapping dinoflagellate blooms (*Noctiluca* and *Alexandrium*) in aquaculture production areas in the NW Iberian Peninsula with the Sentinel-2/3 satellites, *Sci. Total Environ.*, 2023, **868**, 161579.
- M. Sansón, J. Reyes, C. A. Hernández-Díaz and J. G. Braun, Mareas verdes causadas por *Eutreptiella* sp. en playa de San Marcos (N de Tenerife, islas Canarias)(Eutreptiales, Euglenophyta), *Vieraea*, 2005, **33**, 29-40.

R. Sobrino, La purga del mar ó hematófalia, *Mem. R. Soc. Esp. Hist. Nat.* 1918, **10**, 407-458.

B. M. Sweeney, in *Proceedings of the First International Conference on Toxic Dinoflagellate Blooms*, ed. V. R. Lo Cicero, Massachusetts Science and Technology Foundation, Wakefield, Massachusetts, 1975, pp. 225-234.

F. Vives and M. López-Benito, El fitoplancton de la ría de Vigo desde julio de 1955 a junio de 1956, *Invest. Pesq.*, 1957, **10**, 45-146.

*La Voz de Galicia* (Spanish newspaper), <https://www.lavozdeg Galicia.es/hemeroteca/> (reported on 01/09/1981).

*La Voz de Galicia* (Spanish newspaper), <https://www.lavozdeg Galicia.es/hemeroteca/> (reported on 23/07/1977).

*La Voz de Galicia* (Spanish newspaper), <https://www.lavozdeg Galicia.es/hemeroteca/> (reported on 16/08/1984).

*La Voz de Galicia* (Spanish newspaper), <https://www.lavozdeg Galicia.es/hemeroteca/> (reported on 17/06/1997).

*La Voz de Galicia* (Spanish newspaper), <https://www.lavozdeg Galicia.es/hemeroteca/> (reported on 18/08/2001).

*La Voz de Galicia* (Spanish newspaper), <https://www.lavozdeg Galicia.es/hemeroteca/> (reported on 15/08/2001).

*La Voz de Galicia* (Spanish newspaper), <https://www.lavozdeg Galicia.es/hemeroteca/> (reported on 25/07/2006).

*La Voz de Galicia* (Spanish newspaper), <https://www.lavozdeg Galicia.es/hemeroteca/> (reported on 07/08/2014).

*La Voz de Galicia* (Spanish newspaper), <https://www.lavozdeg Galicia.es/hemeroteca/> (reported on 30/08/2014).

*La Voz de Galicia* (Spanish newspaper), <https://www.lavozdeg Galicia.es/hemeroteca/> (reported on 22/09/2014).

*La Voz de Galicia* (Spanish newspaper), <https://www.lavozdeg Galicia.es/hemeroteca/>  
(reported on 15/08/2020).

*La Voz de Galicia* (Spanish newspaper), <https://www.lavozdeg Galicia.es/hemeroteca/>  
(reported on 3-4/09/2021).

*La Voz de Galicia* (Spanish newspaper), <https://www.lavozdeg Galicia.es/hemeroteca/>  
(reported on 24/06/2022).

*La Voz de Galicia* (Spanish newspaper), <https://www.lavozdeg Galicia.es/hemeroteca/>  
(27/04/2023).

G. Wagey, N. Wiadnyana and F. Taylor, Short note on *Alexandrium affine* (Inoe and Fukuyo) Balech red tide in Ambon Bay, Indonesia, *SEAHAB*, 1998, 4, 1-2.

D. Walker and G. Pitcher, The dynamics of phytoplankton populations, including a red-tide bloom, during a quiescent period in St Helena Bay, South Africa, *South Afr. J. Mar. Sci.*, 1991, **10**, 61-70.
