# Supplementary material for: Red tides in the Galician rías: historical overview, ecological impact, and future monitoring strategies
Source: Royal Society of Chemistry journal article supplement (doi:10.1039/d3em00296a), 2023-11-07
Supplement: d3em00296a2.pdf [file d3em00296a2.pdf]

**Supplementary Table S1.** Red tide events reported in Galicia (NW Iberian Peninsula) since 1910. Events were listed in two seasonal groups: spring-summer and autumn; locations are shown in Figure 1.

| Year   | Spring-Summer                                                                      |                                                      | Autumn                                      |                                  |
|--------|------------------------------------------------------------------------------------|------------------------------------------------------|---------------------------------------------|----------------------------------|
|        | Dinoflagellates                                                                    | Others                                               | Dinoflagellates                             | Others                           |
| 1916   | <i>Likely Lingulodinium polyedra</i> (rep. as radiolarians, RV, RP) <sup>1,2</sup> |                                                      |                                             |                                  |
| 1917   | <i>L. polyedra</i> (RP) <sup>2</sup>                                               |                                                      |                                             |                                  |
| 1920's |                                                                                    |                                                      |                                             |                                  |
| 1940's |                                                                                    |                                                      |                                             |                                  |
| 1953   | <i>Tripos furca</i> (RV) <sup>3</sup>                                              |                                                      |                                             |                                  |
| 1955   | <i>Gonyaulax diacantha</i> (RV) <sup>4</sup>                                       | <i>Mesodinium</i> sp. (RV) <sup>4</sup>              |                                             |                                  |
|        | <i>G. spinifera</i> (RV) <sup>4</sup>                                              |                                                      |                                             |                                  |
|        | <i>L. polyedra</i> (RV) <sup>4,5</sup>                                             |                                                      |                                             |                                  |
| 1960's |                                                                                    |                                                      |                                             |                                  |
|        |                                                                                    |                                                      |                                             |                                  |
| 1976   | <i>Gymnodinium catenatum</i> <sup>6</sup>                                          |                                                      |                                             |                                  |
| 1977   | <i>Noctiluca scintillans</i> <sup>6</sup>                                          | <i>Amphidinium</i> sp. <sup>6</sup>                  |                                             |                                  |
|        |                                                                                    | <i>N. scintillans</i> <sup>7</sup>                   |                                             |                                  |
| 1978   | <i>Amphidinium</i> sp. <sup>6</sup>                                                |                                                      |                                             |                                  |
| 1979   | <i>Apedinella</i> sp. <sup>6</sup>                                                 |                                                      |                                             |                                  |
|        | <i>Mesodinium</i> sp. <sup>8</sup>                                                 |                                                      |                                             |                                  |
| 1980   | <i>N. scintillans</i> <sup>6</sup>                                                 | <i>Eutreptiella</i> sp. <sup>6</sup>                 | <i>H. akashiwo</i> <sup>6</sup>             |                                  |
|        |                                                                                    | <i>Mesodinium</i> sp. <sup>6</sup>                   |                                             |                                  |
|        |                                                                                    | <i>Heterosigma akashiwo</i> (RP, RV) <sup>9,10</sup> |                                             |                                  |
| 1981   | <i>N. scintillans</i> <sup>6</sup>                                                 | <i>Mesodinium</i> sp. (RV, RP) <sup>6,11</sup>       | <i>Prorocentrum triestinum</i> <sup>6</sup> | <i>P. rostratum</i> <sup>6</sup> |

|      |                                                                                                                                                                  |                                                                                |                                                                       |
|------|------------------------------------------------------------------------------------------------------------------------------------------------------------------|--------------------------------------------------------------------------------|-----------------------------------------------------------------------|
|      |                                                                                                                                                                  |                                                                                | <i>T. furca</i> <sup>6</sup>                                          |
| 1982 | <i>P. triestinum</i> <sup>6</sup>                                                                                                                                | <i>Mesodinium</i> sp. <sup>6</sup>                                             | <i>P. triestinum</i> <sup>6</sup>                                     |
| 1983 | <i>P. triestinum</i> <sup>6</sup>                                                                                                                                | <i>Mesodinium</i> sp. <sup>6</sup>                                             | <i>P. triestinum</i> <sup>6</sup>                                     |
| 1984 | <i>Alexandrium minutum</i><br><br>(rep. <i>G. tamarensis</i> ,<br><br>RAB) <sup>12</sup><br><br><i>N. scintillans</i> (RV) <sup>13</sup>                         | <i>Mesodinium</i> sp. <sup>6</sup>                                             |                                                                       |
| 1985 |                                                                                                                                                                  | <i>Mesodinium</i> sp. <sup>6</sup><br><br><i>H. akashiwo</i> (RB) <sup>9</sup> | <i>G. catenatum</i> <sup>6</sup><br><br><i>A. affine</i> <sup>6</sup> |
| 1986 |                                                                                                                                                                  | <i>Mesodinium</i> sp. <sup>6</sup><br><br><i>H. akashiwo</i> (RB) <sup>9</sup> | <i>G. catenatum</i> <sup>5</sup><br><br><i>A. affine</i> <sup>6</sup> |
| 1987 | <i>N. scintillans</i> <sup>6</sup><br><br><i>P. micans</i> <sup>6</sup><br><br><i>A. minutum</i> (rep. <i>A. tamarense</i> , Ría de Camariñas, RAC) <sup>9</sup> | <i>H. akashiwo</i> <sup>6</sup>                                                |                                                                       |
| 1989 | <i>Lepidodinium chlorophorum</i><br><br>(rep. as <i>Gyrodinium aureolum</i> , RP, RV) <sup>14,15</sup>                                                           |                                                                                |                                                                       |
| 1990 |                                                                                                                                                                  | <i>Mesodinium</i> sp. (RP) <sup>15</sup>                                       |                                                                       |
| 1993 |                                                                                                                                                                  |                                                                                | <i>G. catenatum</i><br><br>(RV) <sup>16</sup>                         |
| 1996 |                                                                                                                                                                  |                                                                                | <i>Dictyocha speculum</i><br><br>(RCA) <sup>17</sup>                  |
| 1997 |                                                                                                                                                                  | <i>H. akashiwo</i> (RA) <sup>18</sup>                                          | <i>G. cf. polygramma</i> <sup>19</sup>                                |
| 2000 | <i>N. scintillans</i>                                                                                                                                            |                                                                                |                                                                       |

|      |                                                                                                                                        |                                          |                                                                                                                                     |                                             |
|------|----------------------------------------------------------------------------------------------------------------------------------------|------------------------------------------|-------------------------------------------------------------------------------------------------------------------------------------|---------------------------------------------|
|      | (RA, RV, RP, A<br>Lanzada) <sup>20,21</sup>                                                                                            |                                          |                                                                                                                                     |                                             |
| 2001 | <i>N. scintillans</i><br>(RP, RV, A Lanzada) <sup>21,23,24,</sup>                                                                      | <i>Mesodinium</i> sp. (RV) <sup>21</sup> | <i>Karenia</i> cf.<br><i>mikimotoi</i> and <i>P.</i><br><i>cordatum</i> (rep. as <i>P.</i><br><i>minimum</i> , RB) <sup>25,26</sup> |                                             |
| 2003 | <i>L. polyedra</i> (RAB) <sup>27,28</sup>                                                                                              |                                          | <i>L. polyedra</i><br>(RAB) <sup>27,30</sup>                                                                                        |                                             |
| 2005 |                                                                                                                                        | <i>Mesodinium</i> sp. (RM) <sup>29</sup> |                                                                                                                                     |                                             |
| 2006 | <i>Kryptoperidinium</i><br><i>triquetrum</i> (RV) <sup>31</sup><br><i>N. scintillans</i><br>(RM, RP,<br>Baldaio, RAC) <sup>29,32</sup> |                                          |                                                                                                                                     |                                             |
| 2007 |                                                                                                                                        | <i>Mesodinium</i> sp. (RV) <sup>29</sup> |                                                                                                                                     |                                             |
| 2008 | <i>N. scintillans</i> (RA, RP,<br>RV) <sup>29,33</sup><br><i>L. polyedra</i> (Ria de O<br>Barqueiro, RAC) <sup>34</sup>                |                                          |                                                                                                                                     |                                             |
| 2009 |                                                                                                                                        |                                          | <i>N. scintillans</i> (RP) <sup>29</sup>                                                                                            |                                             |
| 2011 | <i>N. scintillans</i> (RP) <sup>35</sup><br><i>L. polyedra</i> (RAB) <sup>35</sup>                                                     | <i>Mesodinium</i> sp. (RV) <sup>29</sup> |                                                                                                                                     |                                             |
| 2014 | <i>N. scintillans</i><br>(RAB, RAC, RV,<br>RP) <sup>29,36,37,39</sup>                                                                  | <i>Mesodinium</i> sp. (RV) <sup>29</sup> | <i>N. scintillans</i><br>(Burela, Foz,<br>Cervo: Lugo) <sup>29,38</sup>                                                             | <i>Mesodinium</i> sp.<br>(RA) <sup>39</sup> |
| 2015 | <i>N. scintillans</i> (RV) <sup>40</sup>                                                                                               | <i>Mesodinium</i> sp. (RV) <sup>41</sup> |                                                                                                                                     |                                             |
| 2017 |                                                                                                                                        |                                          | <i>N. scintillans</i><br>(RV) <sup>41</sup>                                                                                         |                                             |
| 2018 | <i>A. minutum</i> (RP, RV) <sup>42,43</sup>                                                                                            |                                          |                                                                                                                                     |                                             |

|      |                                                                                                  |
|------|--------------------------------------------------------------------------------------------------|
|      | <i>N. scintillans</i> (RV) <sup>44</sup>                                                         |
| 2020 | <i>N. scintillans</i> (RA, RV,<br>RP) <sup>45,46</sup>                                           |
| 2021 | <i>A. tamarense</i> (RC) <sup>44</sup><br><i>N. scintillans</i> (RV, RP,<br>RA) <sup>47-49</sup> |
| 2022 | <i>N. scintillans</i> (RA, RB) <sup>50</sup>                                                     |
| 2023 | <i>A. minutum</i> (RP) <sup>51</sup><br><i>K. triquetrum</i> (RV) <sup>52</sup>                  |

Table 1. Red tides observed in the Galician Rías and other coastal locations (NW Iberian Peninsula). Cases without geographical data belong to the southern Rías Baixas (Fraga, 1989). Other locations outside the Rías are fully indicated. Abbreviations code for the following (northward direction): RV, Ría de Vigo; RP, Ría de Pontevedra; RB, Rías Baixas; RA, Ría de Arousa; RM, Ría de Muros; RAB, Ría de Ares-Betanzos; RAC, Ría de A Coruña; RC, Ría de Corme-Laxe; RCA, Ría de Camariñas.

Sources: <sup>1</sup>de Buen (1917), <sup>2</sup>Sobrinho (1918), <sup>3</sup>Margalef et al. (1955), <sup>4</sup>Margalef (1956), <sup>5</sup>Vives and Benito (1957), <sup>6</sup>Fraga (1989), <sup>7,11,13,18,21,24,32,36-38,46,49,50,51</sup>La Voz de Galicia (several numbers), <sup>8,19-23,33,39,40</sup>Faro de Vigo (several numbers), <sup>9,30,35</sup>ICES Report (1988, 2004, 2012), <sup>10</sup>Figueiras and Niell (1987), <sup>12</sup>Blanco et al. (1985), <sup>14</sup>Jiménez et al. (1992), <sup>15</sup>Reguera B. (pers. obs.), <sup>16</sup>Gómez-Fermín et al. (1996), <sup>17</sup>Prego et al. (1998), <sup>25</sup>ICES Report (2002), <sup>26</sup>Crespo et al. (2007), <sup>27</sup>Arévalo et al. (2006), <sup>28</sup>Pazos and Moroño (2007), <sup>29</sup><https://fitopasion.com/2017/09/un-mar-de-noctilucas-en-la-ria-de-vigo.html>, <sup>31</sup>Fraga S. (pers. obs.), <sup>34</sup>Ospina-Álvarez et al. (2010), <sup>41</sup><https://fitopasion.com/2015/05/marea-roja-en-cabo-home.html>, <sup>42</sup>Nogueira et al. (2022), <sup>43</sup>Ruiz-Villarreal et al. (2022), <sup>44</sup>Rodríguez F. (pers. obs.), <sup>45</sup><https://fitopasion.com/2020/08/las-noctilucas-son-para-el-verano.html>, <sup>47</sup>Sacilotto et al. (2023), <sup>48</sup>Broullón E. (pers. obs.), <sup>52</sup>González-Nuevo G. (pers. obs.),
